# Supplementary material for: Comparison of the sympathetic stimulatory abilities of B-type procyanidins based on induction of uncoupling protein-1 in brown adipose tissue (BAT) and increased plasma catecholamine (CA) in mice
Source: PubMed Central journal article supplement (PMC6066223; doi:10.1371/journal.pone.0201203), 2018-07-30
Supplement: pone.0201203.s002.pdf [file pone.0201203.s002.pdf]

S1 table Recovered amount from 100 g of seed coat and purity of each chemical:

|                 | amount(mg) | purity (%)† |
|-----------------|------------|-------------|
| Procyanidin B2  | 131        | 98.7        |
| Procyanidin C1  | 41.7       | 97.1        |
| Cinnamtannin A2 | 7.5        | 97.6        |
| P5 fraction     | 326.8      | –           |

The value showed the average of duplicate measurements
