# Supplementary material for: Comparison of the sympathetic stimulatory abilities of B-type procyanidins based on induction of uncoupling protein-1 in brown adipose tissue (BAT) and increased plasma catecholamine (CA) in mice
Source: PubMed Central journal article supplement (PMC6066223; doi:10.1371/journal.pone.0201203), 2018-07-30
Supplement: pone.0201203.s003.pdf [file pone.0201203.s003.pdf]

S2 table . Component of basal diet (MF®†, in 100g)

|                                   |       |
|-----------------------------------|-------|
| Moisture(g)                       | 7.9   |
| protein(g)                        | 23.1  |
| lipid(g)                          | 5.1   |
| ash (g)                           | 5.8   |
| fiber (g)                         | 2.8   |
| Soluble nitrogen-free product (g) | 55.3  |
| Calories (kcal)                   | 359   |
| <b>Vitamins</b>                   |       |
| Vitamin A * (IU)                  | 1283  |
| Vitamin D 3 (IU)                  | 137   |
| Vitamin E (mg)                    | 9.1   |
| Vitamin K 3 ** (mg)               | 0.04  |
| Vitamin B 1 (mg)                  | 2.05  |
| Vitamin B 2 (mg)                  | 1.1   |
| Vitamin C (mg)                    | Four  |
| Vitamin B 6 (mg)                  | 0.87  |
| Vitamin B 12 (μ g)                | 5.5   |
| Inositol (mg)                     | 439   |
| Biotin (μ g)                      | 27    |
| Pantothenic acid (mg)             | 2.45  |
| Niacin (mg)                       | 10.61 |
| Choline (g)                       | 0.18  |
| Folic acid (mg)                   | 0.17  |
| <b>Minerals</b>                   |       |
| Calcium (g)                       | 1.07  |
| Phosphorus (g)                    | 0.83  |
| Magnesium (g)                     | 0.24  |
| Sodium (g)                        | 0.19  |
| Potassium (g)                     | 0.9   |
| Iron (mg)                         | 10.6  |
| Aluminum (mg)                     | 2.1   |
| Copper (mg)                       | 0.78  |
| Zinc (mg)                         | 4.89  |
| Cobalt (mg)                       | 0.1   |
| Manganese (mg)                    | 4.84  |
| Ca / P                            | 1.29  |
| Ca / Mg                           | 4.5   |
| K / Na                            | 4.77  |

†: Oriental Yeast Co., Ltd., Tokyo, Japan.
